# Supplementary material for: Serological and genetic complement alterations in infection-induced and complement-mediated hemolytic uremic syndrome
Source: PubMed Central journal article supplement (PMC5203860; doi:10.1007/s00467-016-3496-0), 2016-10-07
Supplement: 467_2016_3496_MOESM1_ESM.pdf [file 467_2016_3496_MOESM1_ESM.pdf]

Article title: Serological and genetic complement alterations in infection-induced and complement mediated HUS

Journal: Pediatric Nephrology

Authors: Dineke Westra, Elena B. Volokhina, Renate G. van der Molen, Thea J.A.M. van der Velden, Annelies Jeronimus-Klaassen, Joop Goertz, Valentina Gracchi, Eiske M. Dorresteijn, Antonia H.M. Bouts, Mandy G. Keijzer-Veen, Johanna A.E. van Wijk, Jaap A. Bakker, Anja Roos, Lambert P. van den Heuvel, Nicole C.A.J. van de Kar

Corresponding author: Dineke Westra, PhD., Dept. of Pediatric Nephrology, Radboud university medical center, Nijmegen, The Netherlands, dineke.westra@radboudumc.nl

Online Resource 1

Serological and genetic complement profile of HUS patients in the acute and convalescent phase of disease. Levels outside the control range for pediatric controls (defined by this study as mean ± 2 standard deviations) are indicated with (†) or (↓). Patient 24 was on eculizumab in both convalescent phases; patient 8 and 24 had a second episode of aHUS.

| Patient | Sex | Age     | Follow up | Disease  | Serotype | Acute phase                                     |            |               |           |              |                |               |              | Convalescent phase |                                                        |           |           |              |                |               |             | Genetics  |                          | αFH              | αO157-LPS    |     |     |
|---------|-----|---------|-----------|----------|----------|-------------------------------------------------|------------|---------------|-----------|--------------|----------------|---------------|--------------|--------------------|--------------------------------------------------------|-----------|-----------|--------------|----------------|---------------|-------------|-----------|--------------------------|------------------|--------------|-----|-----|
|         |     |         |           |          |          | AP (%NHS)                                       | C3 (mg/L)  | FH (mg/L)     | FI (%NHS) | C3d/C3 ratio | C3bBbP (AU/ml) | C3b/c (AU/ml) | TCC (AU/ml)  | AP (%NHS)          | C3 (mg/L)                                              | FH (mg/L) | FI (%NHS) | C3d/C3 ratio | C3bBbP (AU/ml) | C3b/c (AU/ml) | TCC (AU/ml) | Mutations | CFH haplotype*           |                  |              |     |     |
| P1      | M   | 2y 7m   | 4y 5m     | STEC-HUS | O26      | 90.1                                            | 594 (↓)    | 80 (↓)        | 36        | 20.78 (†)    | 3.50 (†)       | 6.67          | 17.62 (†)    | 26.84 (†)          | 106.7                                                  | 1320 (†)  | 280       | 75           | 15.86 (†)      | 1.20 (†)      | 11.66       | 38.31 (†) | 5.23                     | no aberrations   | heterozygous | NEG | NEG |
| P4      | F   | 10y 2m  | 4y 2m     | STEC-HUS | O157     | 84.7                                            | N/D        | 180           | 58        | 49.07 (†)    | N/D            | N/D           | N/D          | 27.14 (†)          | 94.6                                                   | N/D       | 110       | 30           | N/D            | N/D           | 28.91 (†)   | 49.69 (†) | 4.43                     | no aberrations   | heterozygous | NEG | POS |
| P5      | M   | 3y 8m   | 4y 1m     | STEC-HUS | O26      | 112.7                                           | 937        | 240           | 93        | N/D          | N/D            | N/D           | N/D          | N/D                | 120.0 (†)                                              | 1440 (†)  | 320       | 90           | 7.67           | 0.53          | 6.22        | 14.01     | 4.43                     | no aberrations   | not present  | NEG | NEG |
| P7      | F   | 2y 3m   | 3y 11m    | STEC-HUS | O157     | 117.5 (†)                                       | 1630 (†)   | 440           | 124       | N/D          | N/D            | N/D           | N/D          | N/D                | 82.1                                                   | 1140      | 270       | 75           | 6.89           | 0.60          | 14.03       | 20.94 (†) | 3.43                     | no aberrations   | not present  | NEG | NEG |
| P9      | F   | 0y 10m  | 3y 7m     | STEC-HUS | O104     | 91.5                                            | N/D        | 150           | 50        | N/D          | N/D            | N/D           | N/D          | N/D                | 89.5                                                   | 1560 (†)  | 280       | 79           | 8.01           | 0.51          | 15.22       | 28.86 (†) | 5.98                     | no aberrations   | not present  | POS | NEG |
| P10     | M   | 11y 7m  | 3y 7m     | STEC-HUS | O157     | 108.8 (†)                                       | 1160       | 240           | 79        | 13.69 (†)    | 1.18 (†)       | 17.54         | 10.73        | 23.82 (†)          | 103.3                                                  | 1180      | 190       | 69           | 4.70           | 0.40          | 7.29        | 6.03      | 3.99                     | no DNA available |              | POS | POS |
| P12     | M   | 8y 6m   | 3y 4m     | STEC-HUS | O157     | 95.1                                            | 1060       | 220           | 73        | 11.15 (†)    | 1.05           | 16.39         | 7.74         | 9.76 (†)           | 69.9                                                   | 930       | 180       | 75           | 4.13           | 0.44          | 106.88 (†)  | 38.27 (†) | 5.68                     | no aberrations   | not present  | NEG | POS |
| P13     | M   | 7y 7m   | 3y 4m     | STEC-HUS | O157     | 90.3                                            | 1270       | 200           | 83        | 25.08 (†)    | 1.98 (†)       | 34.69 (†)     | 65.09 (†)    | 2.48               | No material available in convalescent phase of disease |           |           |              |                |               |             |           | no aberrations           | not present      | NEG          | POS |     |
| P14     | F   | 2y 8m   | 3y 3m     | STEC-HUS | O5       | 25.1                                            | 415 (↓)    | 170           | 51        | 10.98 (†)    | 2.65 (†)       | 7.48          | 7.02         | 35.85 (†)          | 103.4                                                  | N/D       | 360       | 99           | 3.68           | N/D           | 10.25       | 10.11     | 4.77                     | C3: p.Arg1219His | not present  | NEG | NEG |
| P15     | M   | 3y 6m   | 3y 3m     | STEC-HUS | O157     | 95.1                                            | 764        | 120           | 59        | 38.96 (†)    | 5.10 (†)       | 17.12         | 9.33         | 47.22 (†)          | 114.5 (†)                                              | 1270      | 290       | 101          | 5.59           | 0.44          | 15.72       | 10.32     | 4.97                     | no aberrations   | heterozygous | NEG | NEG |
| P16     | F   | 2y 0m   | 3y 3m     | STEC-HUS | NT       | 104 (†)                                         | 709        | 130           | 61        | 12.42 (†)    | 1.75 (†)       | 10.97         | 9.89         | 8.14 (†)           | 102.1                                                  | 928       | 190       | 59           | 12.42 (†)      | N/D           | 21.14 (†)   | 16.15 (†) | 3.29                     | no aberrations   | not present  | NEG | NEG |
| P19     | F   | 8y 4m   | 2y 8m     | STEC-HUS | NT       | 97.2                                            | 1060       | 190           | 90        | 11.65 (†)    | 1.10 (†)       | 8.85          | 8.76         | 1.48               | No material available in convalescent phase of disease |           |           |              |                |               |             |           | no aberrations           | not present      | NEG          | NEG |     |
| P21     | F   | 6y 3m   | 2y 7m     | STEC-HUS | O157     | No material available in acute phase of disease |            |               |           |              |                |               |              | N/D                | 1230                                                   | 240       | 97        | 7.11         | 0.58           | N/D           | N/D         | 0.11      | CFH: p.Th956Met          | not present      | NEG          | POS |     |
| P22     | M   | 0y 6m   | 2y 7m     | STEC-HUS | O157     | 93.7                                            | 626 (↓)    | 150           | 64        | 10.54 (†)    | 1.68 (†)       | 13.73         | 13.94        | 0.77               | No material available in convalescent phase of disease |           |           |              |                |               |             |           | no aberrations           | not present      | NEG          | POS |     |
| P23     | M   | 1y 3m   | 2y 6m     | STEC-HUS | O157     | 74.1                                            | 884        | 190           | 50        | N/D          | N/D            | N/D           | N/D          | N/D                | No material available in convalescent phase of disease |           |           |              |                |               |             |           | no aberrations           | not present      | NEG          | POS |     |
| P25     | F   | 2y 0m   | 2y 5m     | STEC-HUS | O157     | No material available in acute phase of disease |            |               |           |              |                |               |              | 8.1                | 1310                                                   | 340       | 81        | 6.44         | 0.49           | 10.87         | 9.27        | 4.79      | C3: p.Lys155Gln          | not present      | NEG          | POS |     |
| P26     | M   | 11y 4m  | 2y 5m     | STEC-HUS | NT       | 65.0                                            | 1140       | 200           | 63        | 13.61 (†)    | 1.19 (†)       | 24.00 (†)     | 29.45 (†)    | 15.38 (†)          | 77.5                                                   | 1040      | 220       | 39           | 4.14           | 0.40          | 4.89        | 5.38      | 6.47                     | no aberrations   | not present  | NEG | NEG |
| P27     | F   | 0y 5m   | 2y        | STEC-HUS | NT       | 88.0                                            | 953        | 370           | 92        | 6.78         | N/D            | 13.52         | 11.21        | 2.40               | 66.3                                                   | 710       | 140       | 63           | N/D            | N/D           | N/D         | N/D       | N/D                      | no aberrations   | not present  | NEG | NEG |
| P28     | M   | 0y 5m   | 2y        | STEC-HUS | O26      | 59.5                                            | 462        | 180           | 39        | N/D          | N/D            | N/D           | N/D          | N/D                | 67.6                                                   | 813       | 250       | 48           | 7.59           | N/D           | 11.21       | 16.67 (†) | 0.49                     | no aberrations   | not present  | NEG | NEG |
| P29     | F   | 9y 4m   | 1y 11m    | STEC-HUS | O26      | 90.2                                            | 801        | 230           | 78        | 9.09         | N/D            | 14.36         | 13.39        | 6.02               | 42.6                                                   | 913       | 230       | 65           | 4.64           | 0.51          | 6.88        | 9.96      | 2.97                     | CFH: p.Ser58Ala  | heterozygous | NEG | NEG |
| P30     | F   | 15y 3m  | 1y 11m    | STEC-HUS | O157     | 42.7                                            | 750        | 140           | 48        | 17.10 (†)    | N/D            | 36.89 (†)     | 15.36        | 3.53               | 70.8                                                   | 1030      | 260       | 67           | 3.91           | N/D           | 11.35       | 12.46     | 2.35                     | no aberrations   | not present  | NEG | POS |
| P32     | M   | 17y 9m  | 2y        | STEC-HUS | O157     | 81.2                                            | 1120       | 190           | 71        | N/D          | N/D            | N/D           | N/D          | N/D                | No material available in convalescent phase of disease |           |           |              |                |               |             |           | no aberrations           | not present      | POS          | POS |     |
| P34     | M   | 14y 4m  | 2y 3m     | STEC-HUS | O157     | 99.4 (†)                                        | 1160       | 260           | 70        | 3.87         | N/D            | 21.03 (†)     | 75.15 (†)    | 8.72 (†)           | No material available in convalescent phase of disease |           |           |              |                |               |             |           | no aberrations           | heterozygous     | NEG          | POS |     |
| P36     | F   | 12y 11m | 1y 5m     | STEC-HUS | O157     | 95.2                                            | 810        | N/D           | N/D       | 21.72 (†)    | 2.68 (†)       | 7.34          | 17.91 (†)    | 5.97               | N/D                                                    | 950       | N/D       | N/D          | N/D            | N/D           | N/D         | N/D       | N/D                      | no aberrations   | not present  | NEG | POS |
| P37     | F   | 12y 5m  | 1y 4m     | STEC-HUS | O157     | 85.5                                            | 1340       | N/D           | N/D       | 6.07         | N/D            | 7.29          | 11.70        | 0.44               | N/D                                                    | 1280      | N/D       | N/D          | N/D            | N/D           | N/D         | N/D       | N/D                      | no aberrations   | not present  | NEG | POS |
| P38     | M   | 3y 8m   | 1y 3m     | STEC-HUS | O157     | 92.2                                            | 1010       | N/D           | N/D       | 20.15 (†)    | 2.00 (†)       | 12.83         | 18.77 (†)    | 8.35 (†)           | 67.0                                                   | 864       | N/D       | N/D          | 4.18           | N/D           | 7.41        | 10.49     | 3.29                     | no aberrations   | not present  | NEG | POS |
| P2      | M   | 4y 2m   | 4y 4m     | aHUS     | -        | 95.6                                            | N/D        | 230           | 65        | N/D          | N/D            | N/D           | N/D          | 4.38               | 101.1                                                  | 2170      | 270       | 88           | N/D            | N/D           | N/D         | N/D       | N/D                      | no aberrations   | not present  | NEG | NEG |
| P3      | M   | 6y 8m   | 4y 3m     | aHUS     | -        | 69.5                                            | N/D        | 180           | 60        | N/D          | N/D            | N/D           | N/D          | N/D                | N/D                                                    | 1520      | 150       | 53           | N/D            | N/D           | N/D         | N/D       | N/D                      | no aberrations   | heterozygous | POS | NEG |
| P6      | F   | 6y 4m   | 4y 1m     | aHUS     | -        | 91.1                                            | 970        | 270           | 81        | N/D          | N/D            | N/D           | N/D          | N/D                | No material available in convalescent phase of disease |           |           |              |                |               |             |           | no aberrations           | heterozygous     | NEG          | NEG |     |
| P8      | M   | 12y 7m  | 3y 11m    | aHUS     | -        | 96.3                                            | 110 (↓)    | 430           | 91        | 29.64 (†)    | 26.95 (†)      | 53.51 (†)     | 125.24 (†)   | 3.11               | No material available in convalescent phase of disease |           |           |              |                |               |             |           | C3: p.Arg161Trp          | not present      | NEG          | NEG |     |
| P11     | F   | 7y 0m   | 3y 6m     | aHUS     | -        | 91.3                                            | 1130       | 330           | 115       | 11.56 (†)    | 1.02           | 17.51         | 17.27 (†)    | 2.00               | No material available in convalescent phase of disease |           |           |              |                |               |             |           | no aberrations           | not present      | NEG          | NEG |     |
| P18     | F   | 11y 6m  | 2y 9m     | aHUS     | -        | 34.9                                            | 639        | 200           | 66        | 20.13 (†)    | 3.15 (†)       | N/D           | N/D          | 4.52               | 94.6                                                   | 1190      | 240       | 58           | 6.40           | 0.54          | 7.39        | 10.02     | 5.58                     | no aberrations   | not present  | POS | NEG |
| P20     | M   | 8y 2m   | 2y 8m     | aHUS     | -        | 74.7                                            | 657        | 150           | 41        | N/D          | N/D            | 26.60 (†)     | 29.76 (†)    | 2.35               | No material available in convalescent phase of disease |           |           |              |                |               |             |           | CD46: p.Asp271_Ser272del | homozygous       | NEG          | NEG |     |
| P24     | M   | 0y 6m   | 3y 4m     | aHUS     | -        | 74.1                                            | 1140       | 220           | 81        | N/D          | N/D            | N/D           | N/D          | 12.24 (†)          | N/D                                                    | 1000      | 220       | 81           | 8.28           | 0.83          | 14.07       | 11.4      | 9.39 (†)                 | no aberrations   | homozygous   | NEG | NEG |
| P31     | M   | 5y 7m   | 1y 11m    | aHUS     | -        | 91.2                                            | 927        | N/D           | N/D       | 10.84 (†)    | 1.17 (†)       | 19.93 (†)     | 16.09 (†)    | 1.21               | N/D                                                    | 899       | N/D       | N/D          | 7.39           | 0.74          | 14.75       | 10.48     | 4.52                     | no aberrations   | not present  | POS | NEG |
| P33     | M   | 6y 4m   | 1y 11m    | aHUS     | -        | 2.7 (↓)                                         | 620 (↓)    | 160           | 56        | 20.39 (†)    | 3.29 (†)       | 35.12 (†)     | 26.33 (†)    | 13.43 (†)          | 64.0                                                   | 530 (↓)   | 180       | 46           | N/D            | N/D           | N/D         | N/D       | N/D                      | no aberrations   | not present  | POS | NEG |
| P35     | F   | 9y 11m  | 1y 11m    | aHUS     | -        | 62.1                                            | 645        | 200           | 52        | N/D          | N/D            | N/D           | N/D          | N/D                | No material available in convalescent phase of disease |           |           |              |                |               |             |           | CD46: p.Cys35Tyr         | homozygous       | NEG          | NEG |     |
|         |     |         |           |          |          | Control range                                   | 24-99 %NHS | 639-1312 mg/L | >97 mg/L  | >19.5 %NHS   | <9.73 mg/L     | <1.08 AU/ml   | <19.88 AU/ml | <7.0 AU/ml         | 67.2 %NHS                                              | 970 mg/L  | 230 mg/L  | 62 %NHS      | 8.73 mg/L      | N/D mg/L      | N/D mg/L    | N/D mg/L  | 1.78 AU/ml               | C3: p.Arg161Trp  | not present  | NEG | NEG |

\*Caprioli J, Norris M, Brioschi S, Pianetti G, Castelletti F, Bettinaglio P, Mele C, Bresin E, Cassis L, Gamba S, Porrai F, Buccioni S, Monteferrante G, Fang CJ, Liszewski MK, Kavanagh D, Atkinson JP, Remuzzi G, International Registry of R, Familial HT (2006) Genetics of HUS: the impact of MCP, CFH, and IF mutations on clinical presentation, response to treatment, and outcome. Blood 108:1267-1279

αFH indicates 'autoantibodies against factor H'; aHUS 'atypical HUS'; AP 'alternative complement pathway'; AU 'arbitrary units'; C3 'complement component 3'; CD46 'membrane cofactor protein'; (C)FH 'complement factor H'; F 'Femal'; HUS 'hemolytic uremic syndrome'; LPS 'lipopolysaccharide'; N/D 'not determined'; NEG 'negative'; NHS 'normal human serum'; M 'male'; POS 'positive'; SD 'standard deviation'; STEC-HUS 'Shiga-toxin producing Escherichia coli-induced HUS'; TCC 'terminal complement component'; (†) 'increased compared to controls'; (↓) 'decreased compared to controls'.
